# Supplementary material for: Pure and Pr-doped Ce4W9O33 with superior hydroxyl scavenging ability: humidity-independent oxide chemiresistors
Source: Royal Society of Chemistry journal article supplement (doi:10.1039/d1ta02618f), 2021-01-01
Supplement: d1ta02618f1.pdf [file d1ta02618f1.pdf]

Supplementary Information

**Pure and Pr-doped Ce<sub>4</sub>W<sub>9</sub>O<sub>33</sub> with superior hydroxyl scavenging ability:  
Humidity-independent oxide chemiresistors**

*Jun-Sik Kim,<sup>a</sup> Ki Beom Kim,<sup>a</sup> Hua-Yao Li,<sup>b</sup> Chan Woong Na,<sup>c</sup> Kyeorei Lim,<sup>a</sup> Young Kook Moon,<sup>a</sup> Ji Won Yoon,<sup>a</sup>  
Jong-Heun Lee<sup>a,\*</sup>*

<sup>a</sup>Department of Materials Science and Engineering, Korea University, Seoul 02841, Republic of Korea

<sup>b</sup>School of Optical and Electronic Information, Huazhong University of Science and Technology, 1037 Luoyu Road, Wuhan, Hubei, 430074, P. R. China

<sup>c</sup>Dongnam Regional Division, Korea Institute of Industrial Technology, Busan 46938, Republic of Korea

E-mail: [jongheun@korea.ac.kr](mailto:jongheun@korea.ac.kr) (Jong-Heun Lee)

## EXPERIMENTAL SECTION

### Sensing characteristics

Sensing materials and terpeneol-based ink vehicles are mixed by mortar and pestle to get the viscous slurry (Materials:binder = 2:3 by weight). Sensors were fabricated by screen-printing of the slurry onto the alumina substrate (size:  $1.5 \times 1.5 \text{ mm}^2$ , thickness: 0.25 mm) with two Au electrodes (electrode width: 1 mm, separation: 0.2 mm) on the top surface. Prior to measurements, sensor was annealed at 500 °C for 2 h to remove hydroxyl contents and stabilized the sensor. Electrometer with a computer was used to record DC 2-probe resistance of the sensor and temperature of the sensor was controlled by Ru micro-heater located on the bottom surface. Gas sensing characteristics were investigated at 200 – 400 °C to trimethylamine (TMA) in the different humidity condition and other interfering gases including acetone, ammonia ( $\text{NH}_3$ ), benzene, ethanol, hydrogen ( $\text{H}_2$ ), trimethylamine (TMA), xylene. Relative humidity of gas (temperature: 25 °C) was controlled by mixing synthetic dry air and synthetic humid air and concentration of gases were controlled by mixing synthetic dry/humid air and synthetic gases (100 ppm of gases in dry air balance). Synthetic humid air was generated by passing dry air through the water bubbler and the relative humidity was measured using a commercial humidity sensor. Flow rate was controlled by flow-through technique and fixed at  $100 \text{ cm}^3 \text{ min}^{-1}$ .

### Characterization

The morphology and microstructures of the specimens were investigated by a field-emission scanning electron microscope with an accelerating voltage of 15 kV (FE-SEM, SU-70, Hitachi) and field emission transmission electron microscopy with an accelerating voltage of 20 kV (FE-TEM, JEM-2100F, JEOL). Before SEM measurement, the specimens were sputtered with thin layers of platinum and TEM samples were prepared by a drop of an aqueous dispersion of particles on holey carbon grids. The  $\text{N}_2$  adsorption-desorption isotherms were measured by using the surface area & porosity analyzer (Tristar 3000) at 77 K. The specific surface areas and the pore size distributions were calculated based on the Brunauer-Emmett-Teller (BET) and the Barret-Joyner-Halenda (BJH) models, respectively. X-ray diffraction pattern was recorded on powder specimens with a X-ray diffractometer (XRD, Rigaku, D/MAX-2500 V/PC with  $\text{Cu K}\alpha$  radiation) over the  $2\theta$  range of  $20\text{--}80^\circ$  at a scan rate of  $4^\circ \text{ min}^{-1}$  to confirm the phase and crystallinity. Raman spectra was acquired with a Raman spectrometer (XperRam 200) with the excitation laser wavelength of 532 nm. The chemical states of the specimens were determined using X-ray photoelectron spectroscopy (XPS, VG Scientific ESCALAB 250) with an  $\text{Al K}\alpha$  radiation (1486.6 eV) source. The binding energies were calibrated by taking the C 1s peak at 284.6 eV as reference. Diffuse-reflectance Fourier transform IR spectra (DRIFTS) was recorded with Bruker Vertex 70-FTIR spectrometer equipped with a SMART collector and an MCT detector. The temperature and relative humidity of the test chamber used for DRIFT measurement were controlled by hot plate and synthetic humid air. Temperature programmed desorption (TPD) of  $\text{O}_2$  were conducted in a flow rate of  $50 \text{ ml min}^{-1}$  of He (99.9999 %) and at a ramping rate of  $10^\circ \text{ C min}^{-1}$  (AutoChem II 2920, micromeritics). The sample powders (0.1 g) were packed in a tubular quartz reactor connected to a thermal conductivity detector (TCD), pretreated at 300 °C for 1 hour in a flow of helium. Adsorption of oxygen was conducted at 350 °C for 1 hour in the flow of 5 %  $\text{O}_2/\text{He}$ . The temperature-programmed reduction (TPR) measurement was carried out with 10 %  $\text{H}_2/\text{Ar}$ . Prior to the experiment, 0.1 g of powder was calcined at 350 °C for 1 hour with a ramping rate of  $10^\circ \text{ C min}^{-1}$  in 5 %  $\text{O}_2/\text{He}$ , then cooled to 50 °C. TPR experiment was performed with 10 %  $\text{H}_2/\text{Ar}$ , the temperature being increased from 50 to 650 °C with a ramp rate of  $10^\circ \text{ C min}^{-1}$ . PL emission spectra were obtained using 325 nm He-Cd laser as excitation light source. The fluorescence spectra were recorded using a charge-coupled detector (PI-MAX3, USA) linked to a 0.5 m spectrometer (Spectrograph 500i, USA).

## SUPPLEMENTARY FIGURES

**Figure S1**

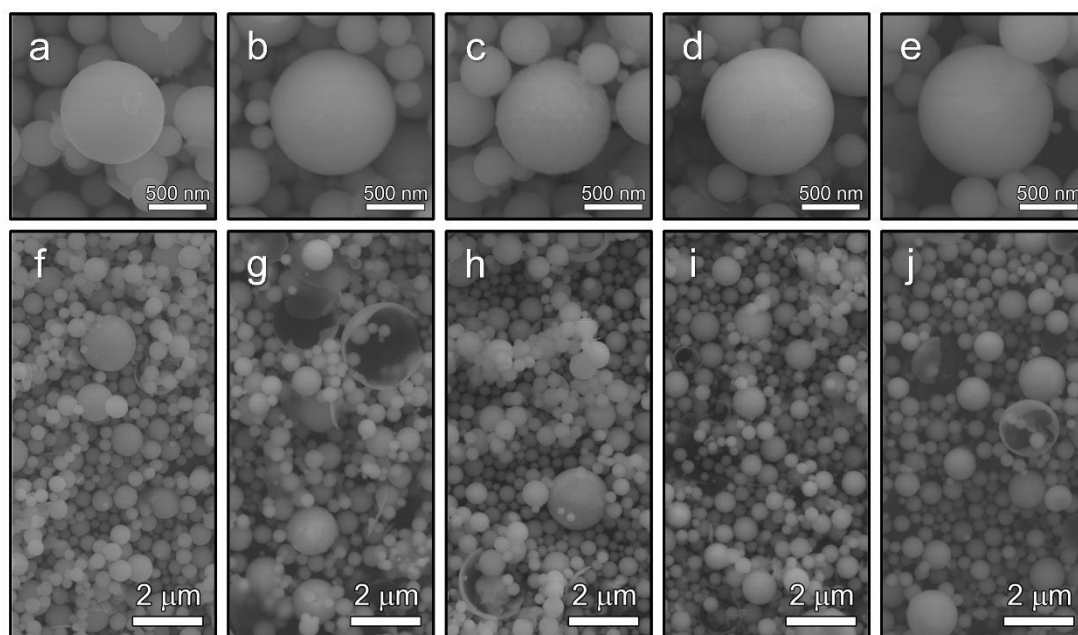

**Figure S1** SEM images of as-prepared precursors for the preparation of (a, f)  $\text{WO}_3$ , (b, g)  $\text{Ce}_4\text{W}_9\text{O}_{33}$ , (c, h)  $\text{Pr}_{0.1}\text{Ce}_{0.9}\text{W}$  (d, i)  $\text{Pr}_{0.2}\text{Ce}_{0.8}\text{W}$ , and (e, j)  $\text{Pr}_{0.3}\text{Ce}_{0.7}\text{W}$ .

**Figure S2**

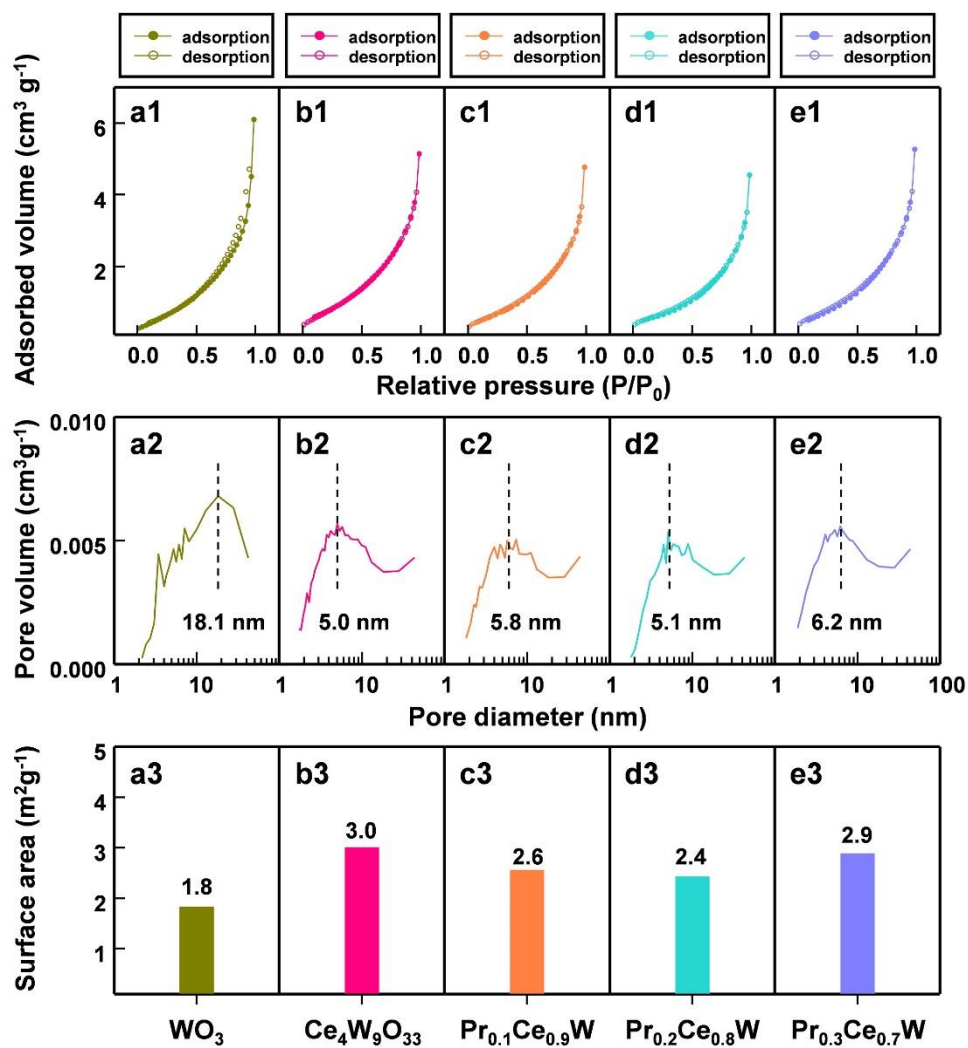

**Figure S2** Nitrogen physisorption isotherm, pore size distribution, and specific surface area of (a)  $\text{WO}_3$ , (b)  $\text{Ce}_4\text{W}_9\text{O}_{33}$ , (c)  $\text{Pr}_{0.1}\text{Ce}_{0.9}\text{W}$  (d)  $\text{Pr}_{0.2}\text{Ce}_{0.8}\text{W}$ , and (e)  $\text{Pr}_{0.3}\text{Ce}_{0.7}\text{W}$ .

**Figure S3**

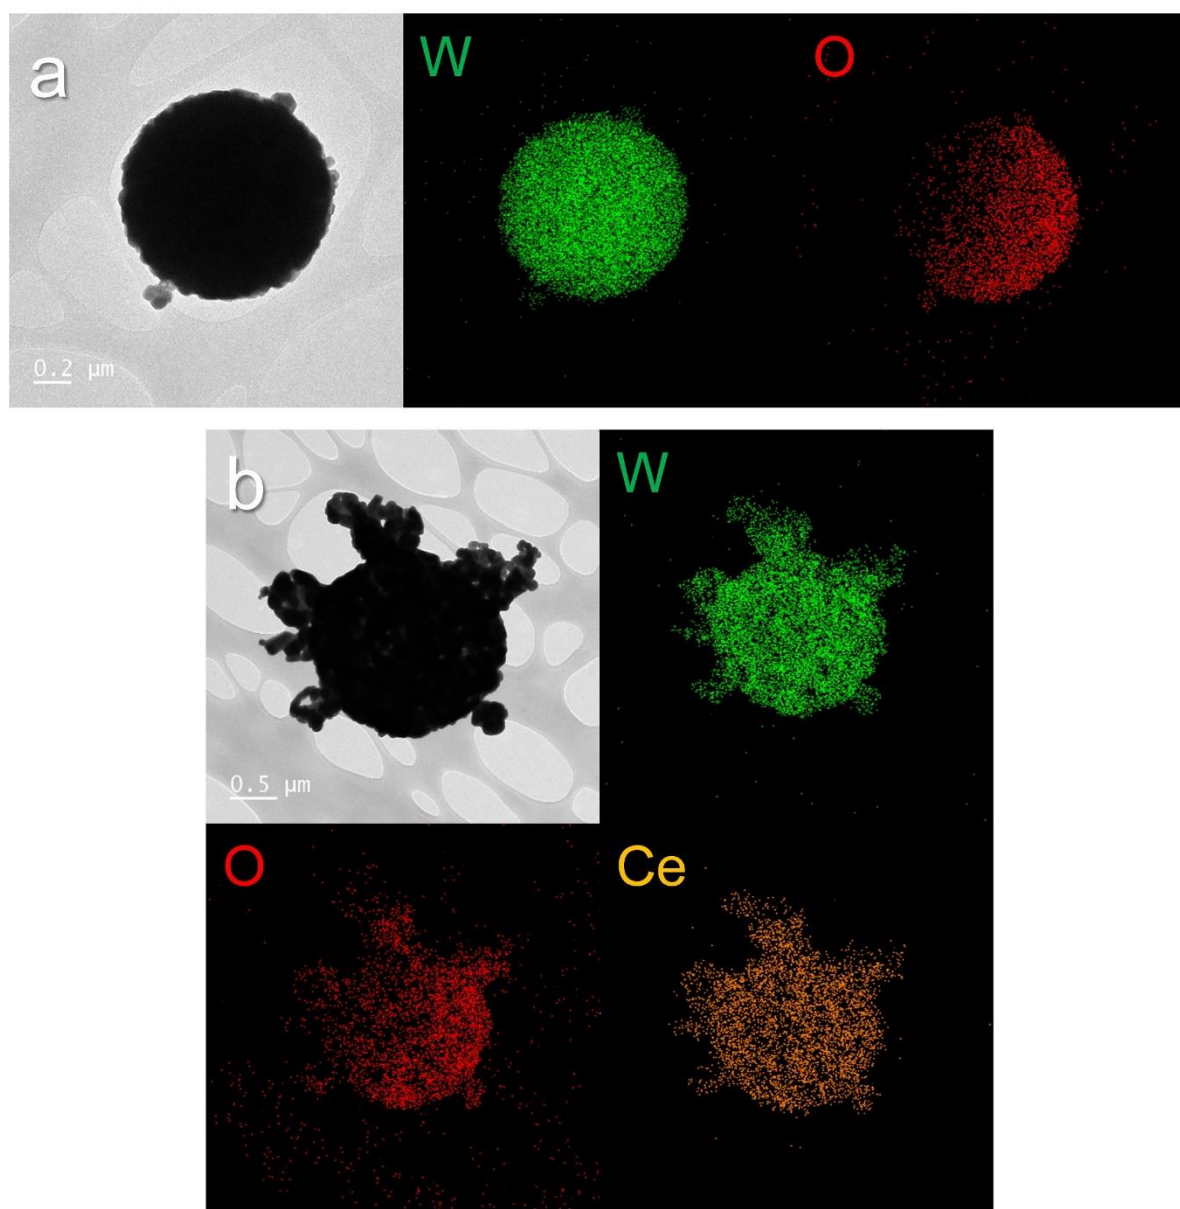

**Figure S3** Elemental mapping of (a)  $\text{WO}_3$  and (b)  $\text{Ce}_4\text{W}_9\text{O}_{33}$ .

**Figure S4**

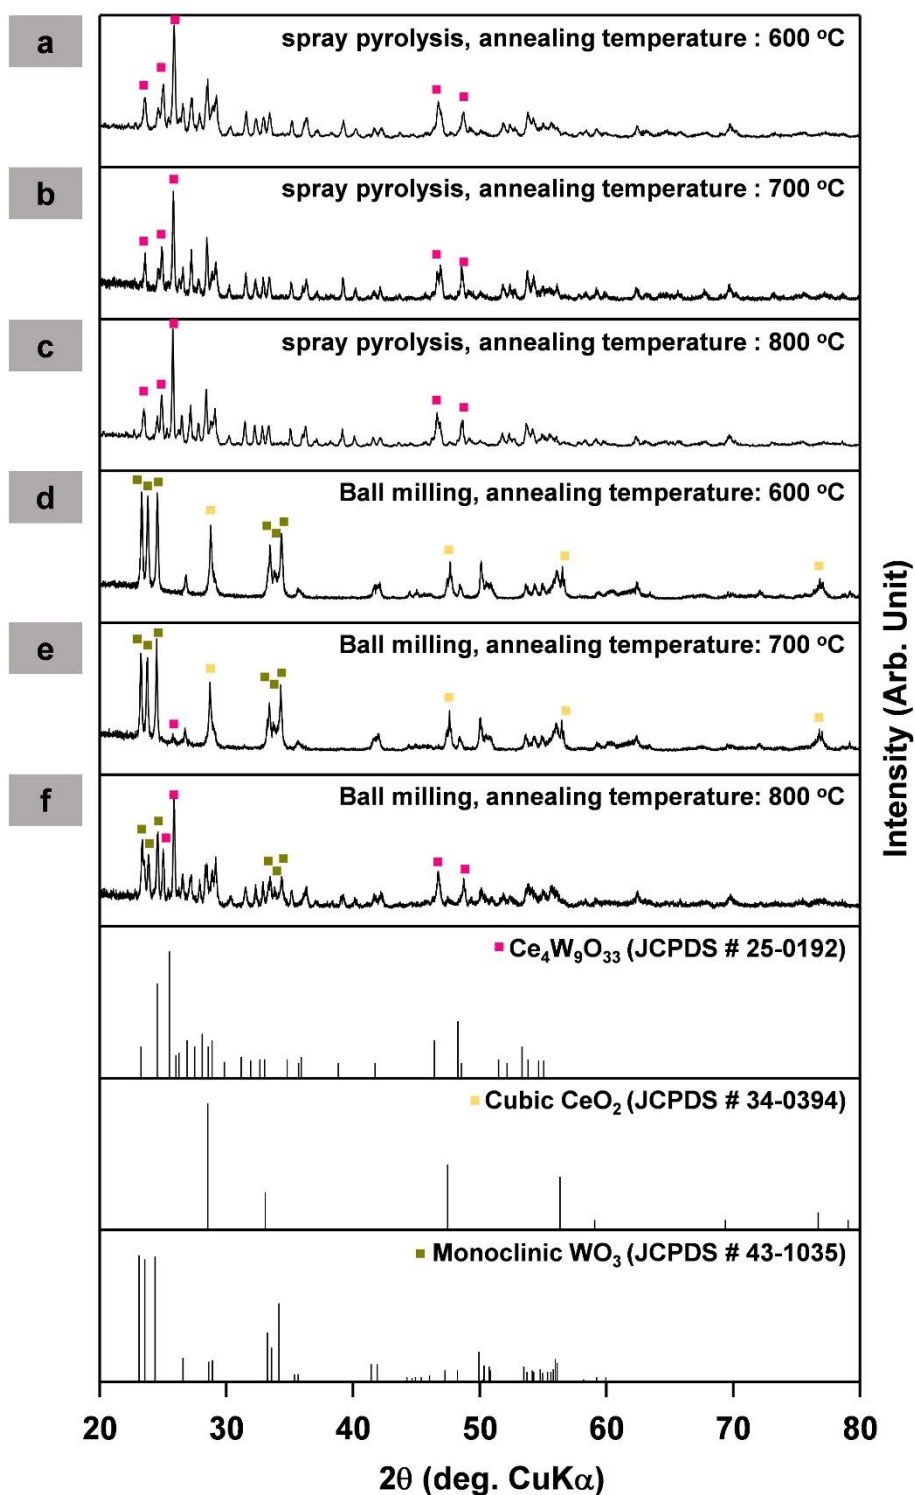

**Figure S4** X-ray diffraction patterns of  $\text{Ce}_4\text{W}_9\text{O}_{33}$  prepared by ultrasonic spray pyrolysis and subsequent annealing at (a) 600, (b) 700, and (c) 800 °C for 2h.; X-ray diffraction patterns of powders prepared by thermal annealing of ball-milled mixtures between  $\text{CeO}_2$  and  $\text{WO}_3$  (Ce:W=4:9) at (d) 600, (e) 700, and (f) 800 °C for 2 h.

**Figure S5**

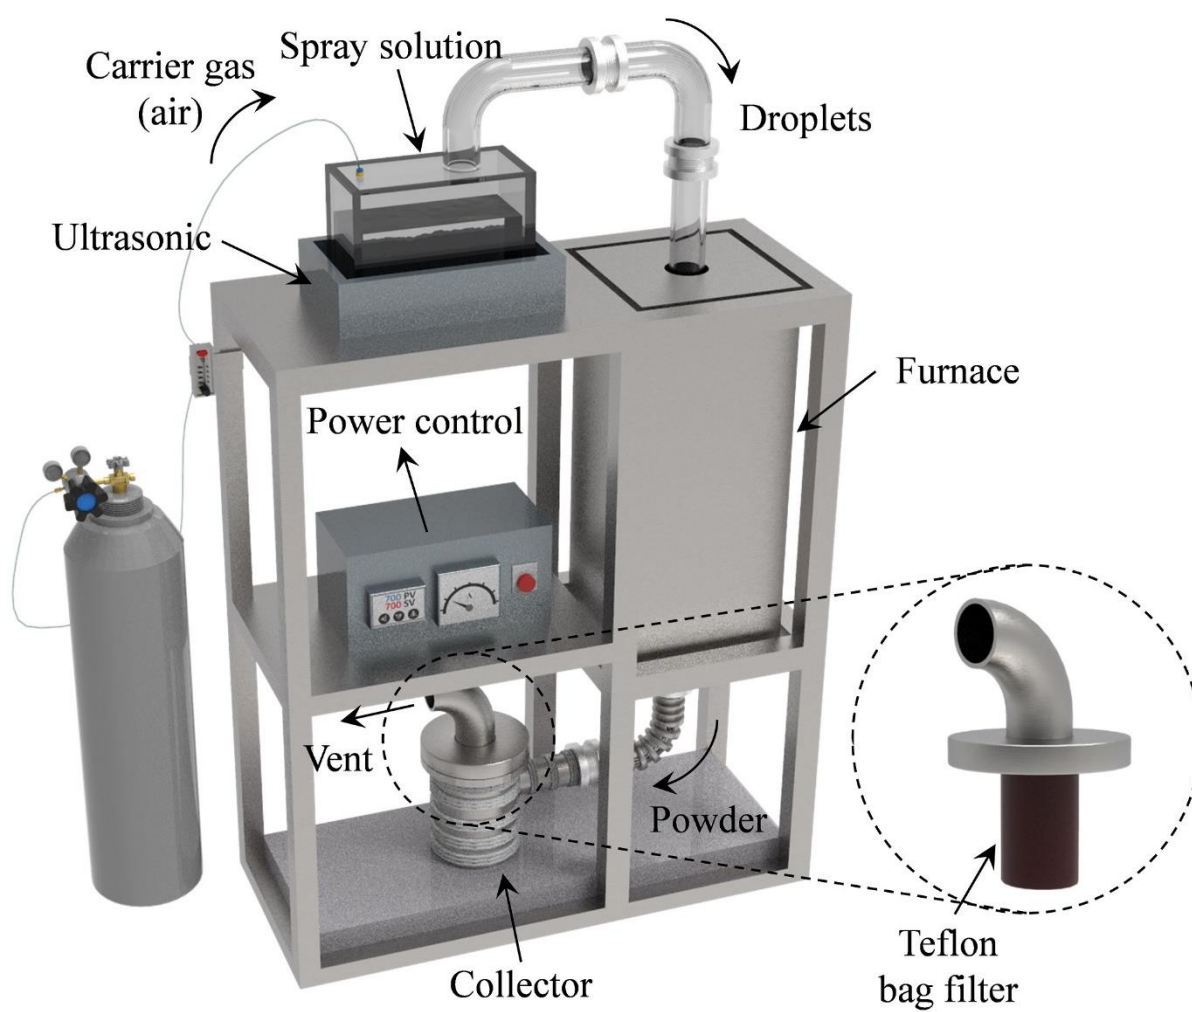

**Figure S5** Schematic images of ultrasonic spray pyrolysis system.

**Figure S6**

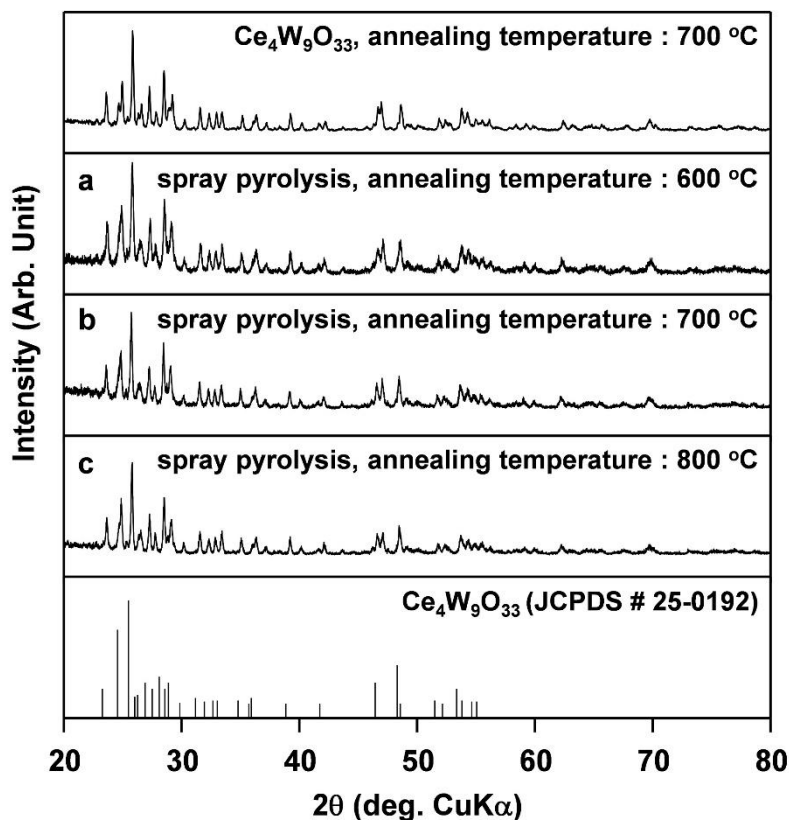

**Figure S6** X-ray diffraction patterns of powders prepared by ultrasonic spray pyrolysis of aqueous solution containing Pr and W salts (Pr:W =4:9) and subsequent annealing at (a) 600, (b) 700, and (c) 800 °C for 2 h.

A specimen in which Pr and W metal salts were mixed in a ratio of 4:9 was synthesized in the same experimental procedure. XRD patterns of powders annealed at 600 – 800 °C were almost identical to the  $\text{Ce}_4\text{W}_9\text{O}_{33}$  phase. This suggests that both Ce and Pr form a  $2\text{Ln}_2\text{O}_3\cdot 9\text{WO}_3$  ( $\text{Ln}_4\text{W}_9\text{O}_{33}$ ) phase ( $\text{Ln} = \text{Ce}, \text{Pr}$ ) occupying the same sites which allow substitutional doping each other. Yoshimura et al.<sup>S1</sup> suggested that  $2\text{Pr}_2\text{O}_3\cdot 9\text{WO}_3$  is also stable phase in the  $\text{Pr}_2\text{O}_3\text{-WO}_3$  system but X-ray diffraction pattern of this phase has not been reported yet.



**Figure S7**

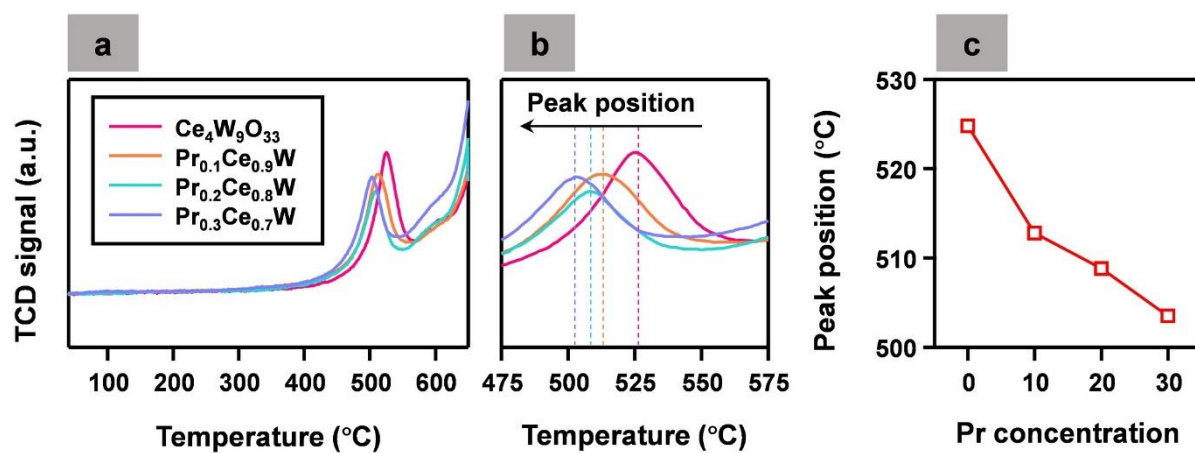

**Figure S7** Thermal conductivity detector (TCD) signal of  $\text{H}_2$ -TPR analysis for (a, b)  $\text{Ce}_4\text{W}_9\text{O}_{33}$  and Pr-doped  $\text{Ce}_4\text{W}_9\text{O}_{33}$ ; (c) Peak position shift depending on the Pr concentration.

**Figure S8**

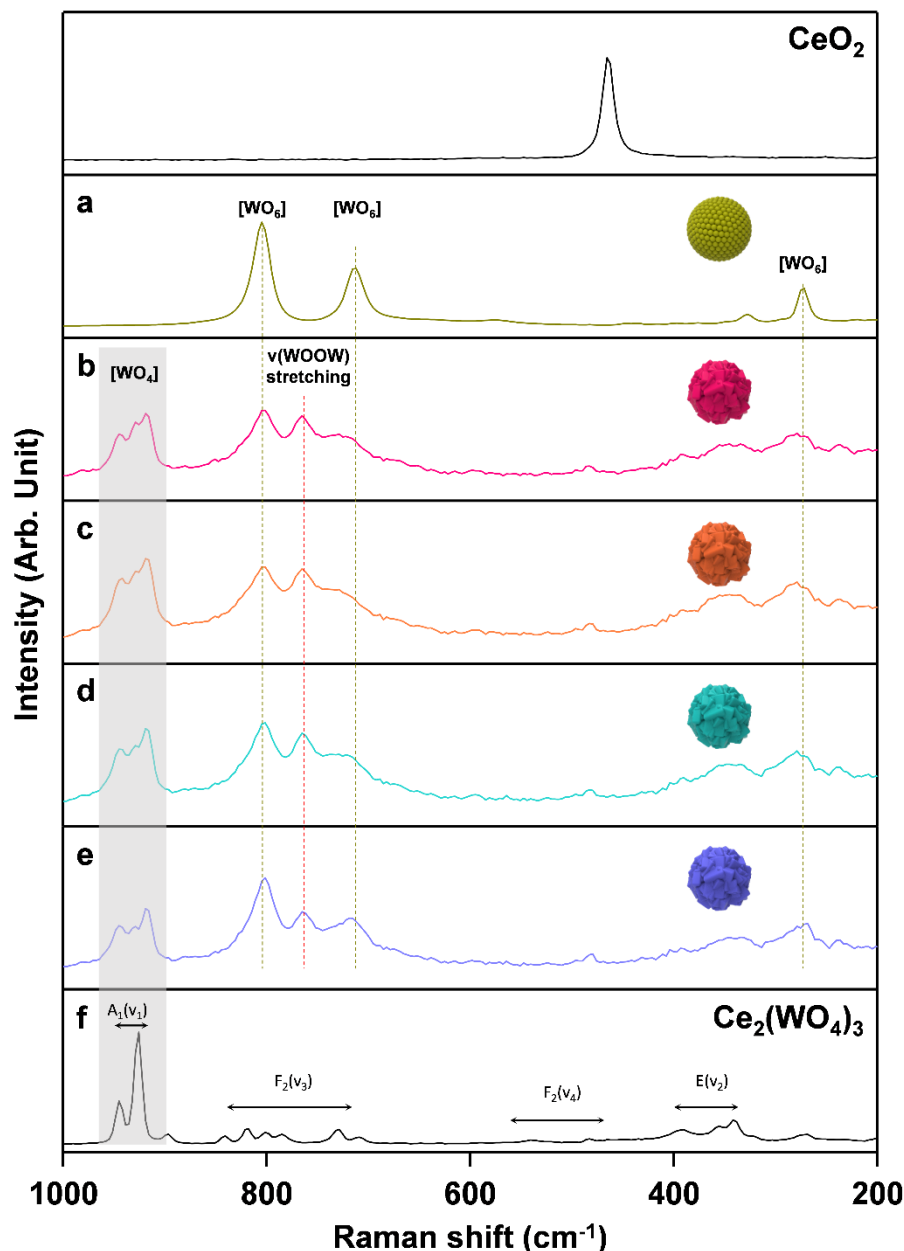

**Figure S8** Raman spectra of (a)  $\text{WO}_3$ , (b)  $\text{Ce}_4\text{W}_9\text{O}_{33}$ , (c)  $\text{Pr}_{0.1}\text{Ce}_{0.9}\text{W}$  (d)  $\text{Pr}_{0.2}\text{Ce}_{0.8}\text{W}$ , (e)  $\text{Pr}_{0.3}\text{Ce}_{0.7}\text{W}$ , and (f)  $\text{Ce}_2(\text{WO}_4)_3$ .

Raman spectra of  $\text{CeO}_2$  and  $\text{Ce}_2(\text{WO}_4)_3$  powders were examined as a reference spectra ( $\text{CeO}_2$ : commercial powders  $\text{Ce}_2(\text{WO}_4)_3$ : powders synthesized by spray pyrolysis using aqueous solution containing cerium and tungsten source [ $\text{Ce}:\text{W} = 2:3$ ]). Raman spectra of the  $\text{Ce}_4\text{W}_9\text{O}_{33}$  specimen showed the peaks of stretching mode and bending mode of the W-O-W bond of  $\text{WO}_6$  units<sup>S2,S3</sup> but there is no peaks related to the fluorite  $\text{CeO}_2$  lattice<sup>S4</sup> (Fig. S8b). Raman bands at the  $767\text{ cm}^{-1}$  could be ascribed to the stretching mode of W-O-O-W vibration.<sup>S5</sup> Raman spectra of  $\text{Ce}_2(\text{WO}_4)_3$  exhibited raman bands at  $944$  and  $925\text{ cm}^{-1}$  assigned to two different types of  $\text{WO}_4$  tetrahedrons in bravais cell.<sup>S6</sup> Therefore, additional peaks located at  $900\text{-}1000\text{ cm}^{-1}$  in the Raman spectrum of  $\text{Ce}_4\text{W}_9\text{O}_{33}$  highlighted in transparent grey box could be assigned  $\text{WO}_4$  units known to exist in the  $\text{Ce}_4\text{W}_9\text{O}_{33}$  lattice.<sup>S7</sup> As a result,  $\text{Ce}_4\text{W}_9\text{O}_{33}$  lattice is expected to contain both  $[\text{WO}_4]$  and  $[\text{WO}_6]$  units joined by bridging WOOW and WOW bonds, but further study is needed for exact crystalline structure.

Pr doped  $\text{Ce}_4\text{W}_9\text{O}_{33}$  showed similar Raman spectra to  $\text{Ce}_4\text{W}_9\text{O}_{33}$ , no additional peaks related to the Pr doping (Fig. S8c-e). However, in the  $\text{Pr}_{0.3}\text{Ce}_{0.7}\text{W}$  spectra, there is strong increase in the stretching modes of W-O-W bond of  $\text{WO}_6$  units. This can be ascribed to the distortion of the lattice by Pr doping with different ionic radius and electronegativity. This result can be supported by  $\text{O}_2$ -TPD analysis in which oxygen desorption peak was abruptly increased in  $\text{Pr}_{0.3}\text{Ce}_{0.7}\text{W}$  specimen (Fig. S9b).

**Figure S9**

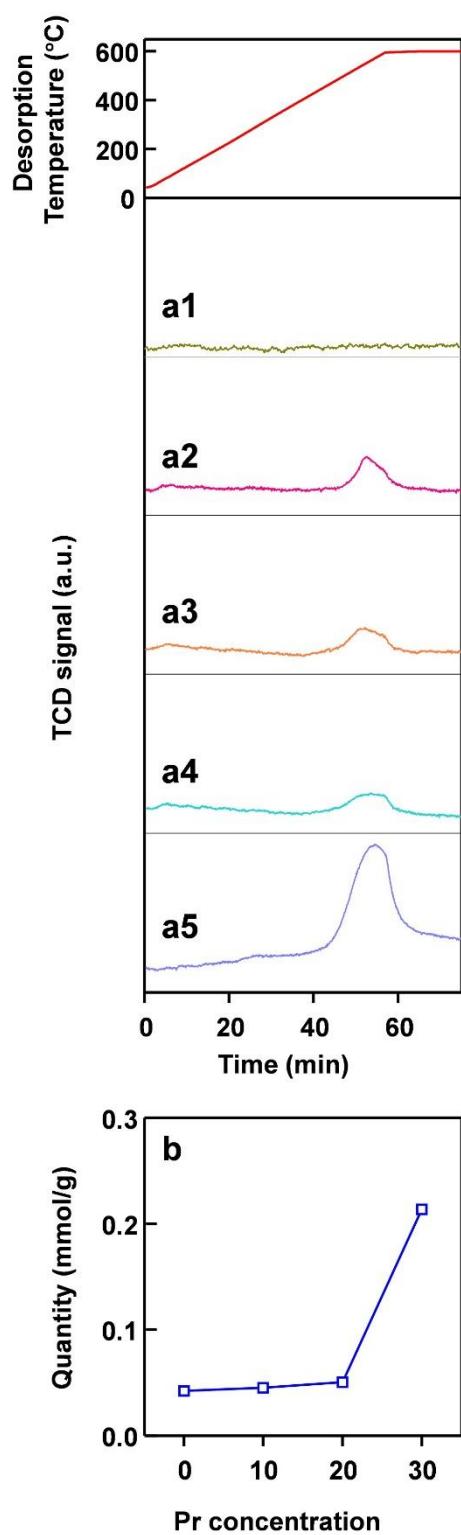

**Figure S9** TCD signal of O<sub>2</sub>-TPD analysis for (a1) WO<sub>3</sub>, (a2) Ce<sub>4</sub>W<sub>9</sub>O<sub>33</sub>, (a3) Pr<sub>0.1</sub>Ce<sub>0.9</sub>W (a4) Pr<sub>0.2</sub>Ce<sub>0.8</sub>W (a5) Pr<sub>0.3</sub>Ce<sub>0.7</sub>W.; (b) quantity of adsorbed oxygen.

**Figure S10**

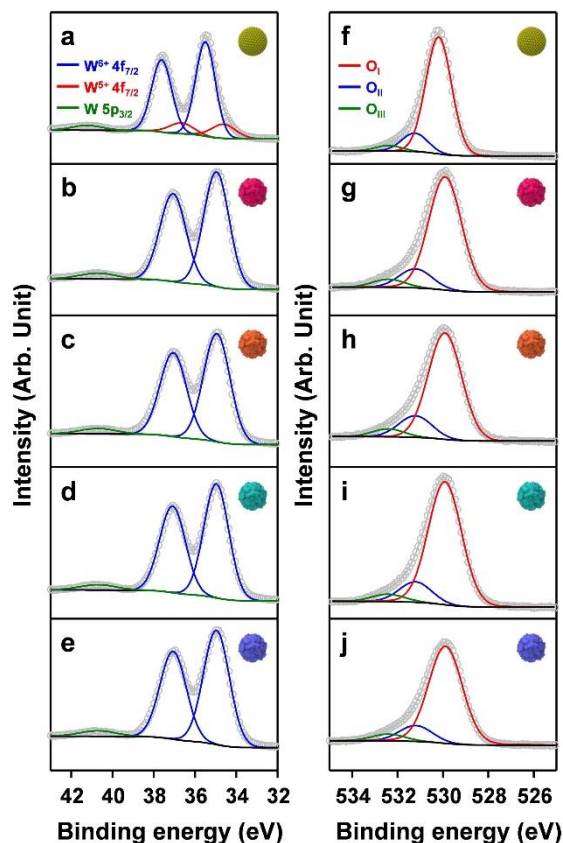

**Figure S10** Fine scanned W 4f XPS spectra of (a)  $\text{CeO}_2$ , (b)  $\text{Ce}_4\text{W}_9\text{O}_{33}$ , (c)  $\text{Pr}_{0.1}\text{Ce}_{0.9}\text{W}$  (d)  $\text{Pr}_{0.2}\text{Ce}_{0.8}\text{W}$ , and (e)  $\text{Pr}_{0.3}\text{Ce}_{0.7}\text{W}$ ; O 1s XPS spectra of (f)  $\text{CeO}_2$ , (g)  $\text{Ce}_4\text{W}_9\text{O}_{33}$ , (h)  $\text{Pr}_{0.1}\text{Ce}_{0.9}\text{W}$  (i)  $\text{Pr}_{0.2}\text{Ce}_{0.8}\text{W}$ , and (j)  $\text{Pr}_{0.3}\text{Ce}_{0.7}\text{W}$ .

W 4f and O 1s spectra of the  $\text{WO}_3$ ,  $\text{Ce}_4\text{W}_9\text{O}_{33}$ , and Pr-doped  $\text{Ce}_4\text{W}_9\text{O}_{33}$  were shown in the Figure S10. The W 4f spectra was peak fitted using voigt profile to satisfy the condition that spin-orbit separation is 2.1 eV and the area ratio of W  $4f_{5/2}$  and W  $4f_{7/2}$  doublets is 3:4. W 4f XPS spectrum of the  $\text{WO}_3$  showed strong peaks at the 35.5 and 37.6 eV which can be attributed to the  $\text{W}^{6+}$  components and also showed  $\text{W}^{5+}$  related peaks at 34.6 and 36.7 eV (Fig. S10a). Most of the W element is considered to be  $\text{W}^{6+}$  with small amount of  $\text{W}^{5+}$  (15.1 %) in the  $\text{WO}_3$  lattice. For the  $\text{Ce}_4\text{W}_9\text{O}_{33}$  and Pr-doped  $\text{Ce}_4\text{W}_9\text{O}_{33}$  specimens,  $\text{W}^{5+}$  related components were not observed, and the FWHM of  $\text{W}^{6+}$  components increased (FWHM of  $\text{W}^{6+}$  in  $\text{WO}_3$ : 1.1 eV, FWHM of  $\text{W}^{6+}$  in  $\text{Ce}_4\text{W}_9\text{O}_{33}$  and Pr-doped  $\text{Ce}_4\text{W}_9\text{O}_{33}$ : 1.4 ~ 1.5 eV). No significant change of the W 4f spectra was observed as the Pr concentration increases (Fig. S10c-e). The O 1s spectra of the specimens were shown in the Figure S10f-j and curve-fitted into 3 peaks ( $\text{O}_I$ : lattice oxygen,  $\text{O}_{II}$ : hydroxyl or adsorbed oxygen,  $\text{O}_{III}$ :  $\text{H}_2\text{O}$ ). The position of the  $\text{O}_I$  peak by lattice oxygen was located at 530.2 eV for  $\text{WO}_3$ , and 529.9 eV for  $\text{Ce}_4\text{W}_9\text{O}_{33}$  and Pr-doped  $\text{Ce}_4\text{W}_9\text{O}_{33}$  samples, and there was no significant difference in the peak positions for  $\text{O}_{II}$  and  $\text{O}_{III}$ . In all samples, oxygen was mostly present as lattice oxygen, and the differences in amount of lattice oxygen were not large (78.6 ~ 83.0 %), and the FWHM values increased from 1.3 eV in the  $\text{WO}_3$  sample to 1.7 eV in the other samples.

**Figure S11**

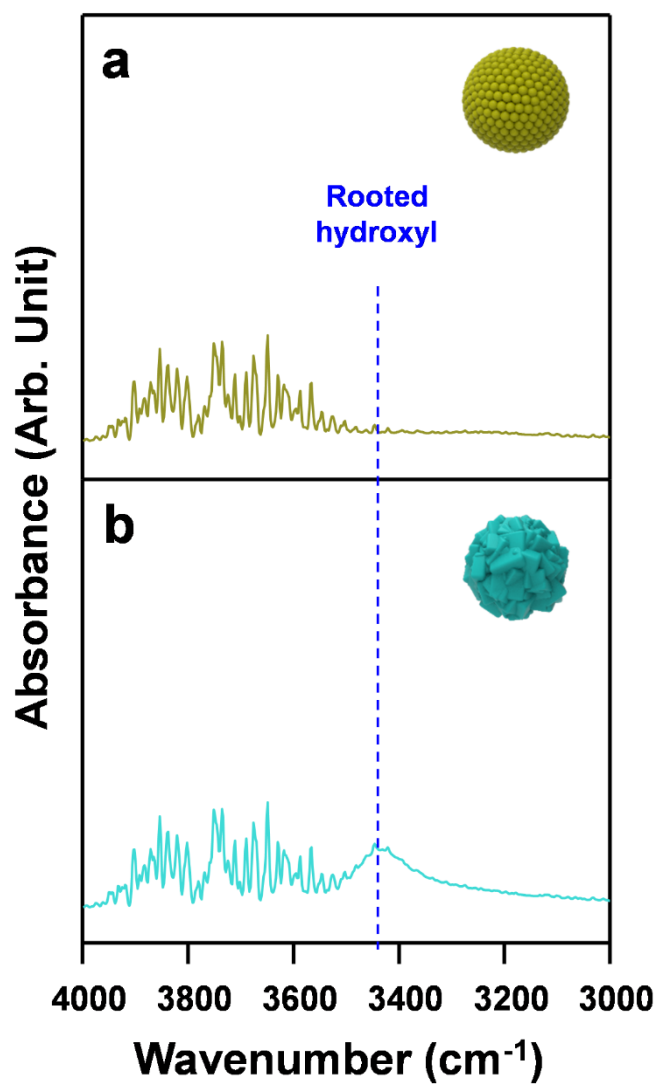

**Figure S11** Absorbance of (a)  $\text{WO}_3$  and (b)  $\text{Pr}_{0.2}\text{Ce}_{0.8}\text{W}$  in RH 80% referenced to RH 0% by DRIFT analysis at 350 °C.

**Figure S12**

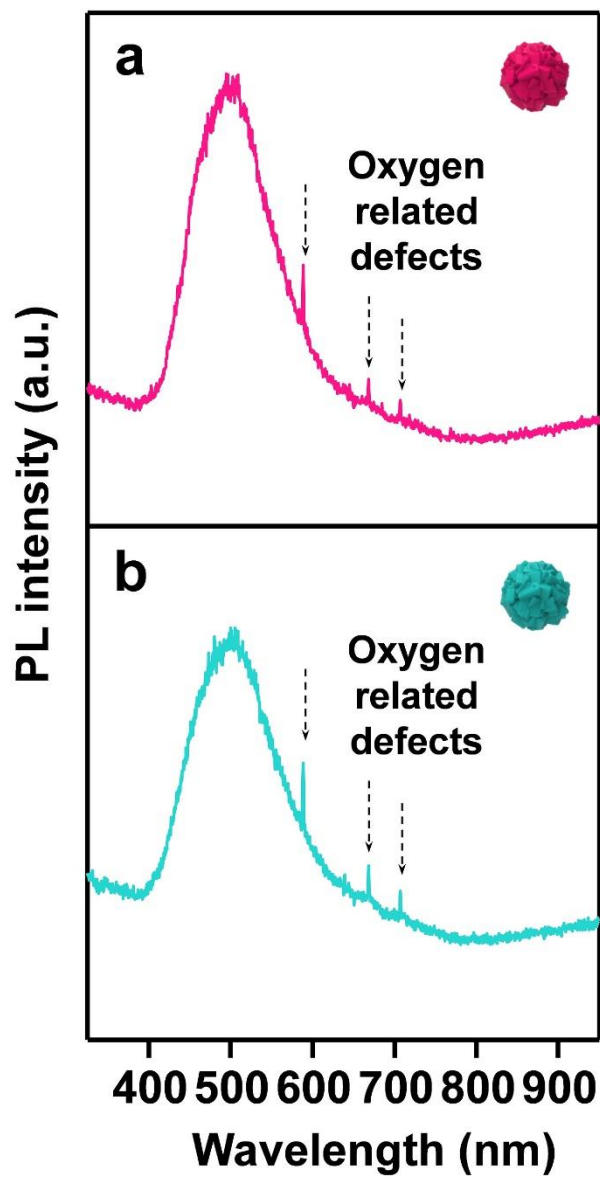

**Figure S12** PL spectra of (a)  $\text{Ce}_4\text{W}_9\text{O}_{33}$  and (b)  $\text{Pr}_{0.2}\text{Ce}_{0.8}\text{W}$ .

**Figure S13**

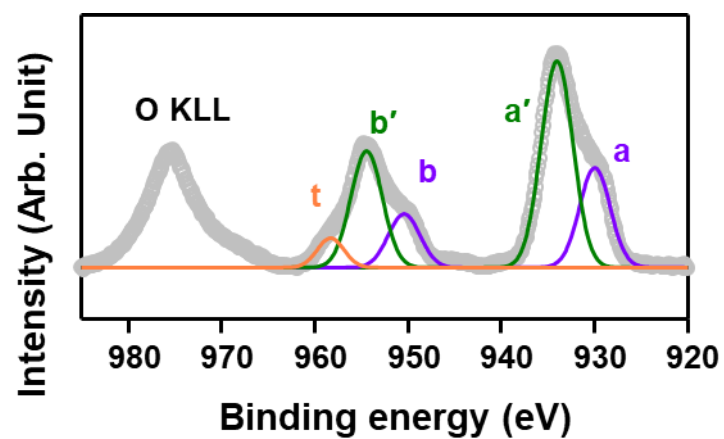

**Figure S13** Fine scanned XPS Pr 3d spectra of  $\text{Pr}_4\text{W}_9\text{O}_{33}$ .



**Figure S14**

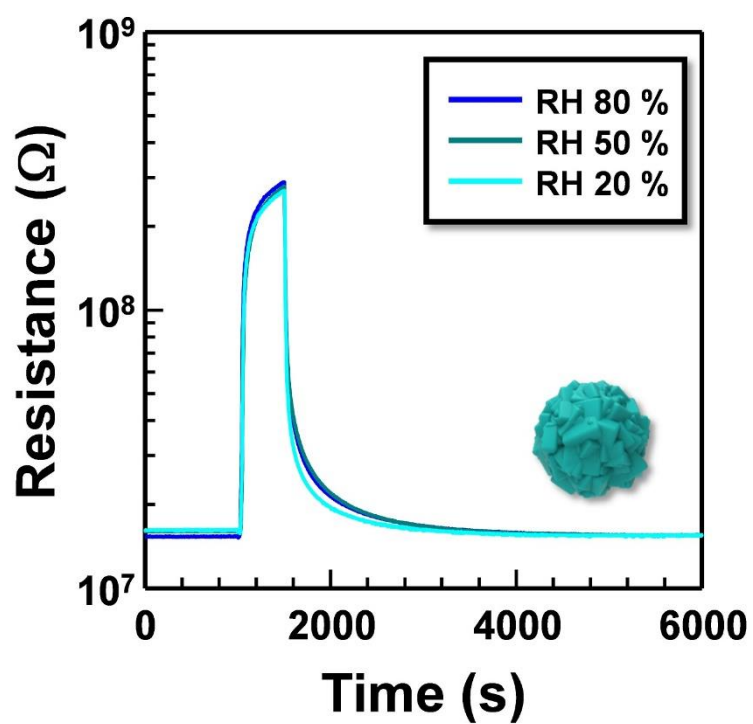

**Figure S14** Dynamic sensing transients of  $\text{Pr}_{0.2}\text{Ce}_{0.8}\text{W}$  sensor to 20 ppm TMA in different humidity conditions (RH 20, 50, and 80 %) at 350 °C.

**Table S1** Humidity independent sensing characteristics of gas sensors using lanthanide elements in the literature.<sup>S8-S11</sup>

| Sensing materials                                                                | Type     | Operating temperature (°C) | Target gas | Concentration (ppm) | Resistance ratio ( $R_{a-humid}/R_{a-dry}$ ) (%) | Gas response |                 | Reference         |
|----------------------------------------------------------------------------------|----------|----------------------------|------------|---------------------|--------------------------------------------------|--------------|-----------------|-------------------|
|                                                                                  |          |                            |            |                     |                                                  | dry          | Humid (RH 80 %) |                   |
| CeO <sub>2</sub> -loaded In <sub>2</sub> O <sub>3</sub>                          | N        | 450                        | Acetone    | 20                  | 98.7                                             | 4.7          | 4.5             | [S8]              |
| Tb-doped SnO <sub>2</sub>                                                        | N        | 450                        | Acetone    | 20                  | 76.7                                             | 15.9         | 12.7            | [S9]              |
| Pr-doped In <sub>2</sub> O <sub>3</sub>                                          | N        | 450                        | Acetone    | 20                  | 98.8                                             | 9.1          | 9.3             | [S10]             |
| Tb <sub>4</sub> O <sub>7</sub> -coated In <sub>2</sub> O <sub>3</sub>            | N        | 400                        | Acetone    | 10                  | 93.4                                             | 11.2         | 11.8            | [S11]             |
| <b>(Pr<sub>0.2</sub>Ce<sub>0.8</sub>)<sub>4</sub>W<sub>9</sub>O<sub>33</sub></b> | <b>P</b> | <b>350</b>                 | <b>TMA</b> | <b>20</b>           | <b>103.4</b>                                     | <b>20.1</b>  | <b>18.8</b>     | <b>This study</b> |

**Table S2 XPS Ce 3d spectra peak table**

| Peak                                           | $v_0$<br>(Ce <sup>3+</sup> ) | v       | $v'$<br>(Ce <sup>3+</sup> ) | $v''$       | $v'''$        | $u_0$<br>(Ce <sup>3+</sup> ) | u     | $u'$<br>(Ce <sup>3+</sup> ) | $u''$ | $u'''$ |
|------------------------------------------------|------------------------------|---------|-----------------------------|-------------|---------------|------------------------------|-------|-----------------------------|-------|--------|
| Ce 3d peak BE values (eV)                      |                              |         |                             |             |               |                              |       |                             |       |        |
| CeO <sub>2</sub>                               | 880.0                        | 881.7   | 884.1                       | 888.2       | 897.6         | 898.5                        | 900.2 | 902.4                       | 906.8 | 916.0  |
| Ce <sub>4</sub> W <sub>9</sub> O <sub>33</sub> | 881.4                        | 883.4   | 885.6                       | -           | 897.7         | 899.9                        | 901.9 | 904.1                       | 907.5 | 916.2  |
| Pr <sub>0.1</sub> Ce <sub>0.9</sub> W          | 881.4                        | 883.4   | 885.6                       | -           | 897.8         | 899.9                        | 901.9 | 904.1                       | 907.5 | 916.3  |
| Pr <sub>0.2</sub> Ce <sub>0.8</sub> W          | 881.4                        | 883.4   | 885.6                       | -           | 897.7         | 899.9                        | 902.0 | 904.1                       | 907.4 | 916.2  |
| Pr <sub>0.3</sub> Ce <sub>0.7</sub> W          | 881.4                        | 883.4   | 885.6                       | -           | 897.7         | 899.9                        | 902.0 | 904.1                       | 907.5 | 916.2  |
| Area percentages I (%)                         |                              |         |                             |             |               |                              |       |                             |       |        |
| CeO <sub>2</sub>                               | 2.43                         | 13.8    | 17.33                       | 11.31       | 14.99         | 1.61                         | 8.85  | 11.5                        | 7.81  | 10.37  |
| Ce <sub>4</sub> W <sub>9</sub> O <sub>33</sub> | 19.54                        | 5.16    | 32.23                       | -           | 1.18          | 13.33                        | 3.52  | 22.14                       | 2.08  | 0.81   |
| Pr <sub>0.1</sub> Ce <sub>0.9</sub> W          | 20.29                        | 4.83    | 32.55                       | -           | 1.33          | 13.24                        | 3.28  | 21.65                       | 1.94  | 0.90   |
| Pr <sub>0.2</sub> Ce <sub>0.8</sub> W          | 20.52                        | 4.76    | 32.68                       | -           | 1.45          | 13.40                        | 3.24  | 21.34                       | 1.66  | 0.95   |
| Pr <sub>0.3</sub> Ce <sub>0.7</sub> W          | 20.10                        | 5.49    | 31.46                       | -           | 1.62          | 13.54                        | 3.73  | 20.90                       | 2.07  | 1.08   |
| FWHM (eV)                                      |                              |         |                             |             |               |                              |       |                             |       |        |
| CeO <sub>2</sub>                               | 1.8                          | 1.7     | 4.0                         | 3.6         | 1.9           | 1.8                          | 1.6   | 4.1                         | 3.5   | 1.9    |
| Ce <sub>4</sub> W <sub>9</sub> O <sub>33</sub> | 3.1                          | 2.3     | 3.7                         | -           | 2.4           | 3.1                          | 2.3   | 3.7                         | 2.4   | 2.4    |
| Pr <sub>0.1</sub> Ce <sub>0.9</sub> W          | 3.1                          | 2.3     | 3.7                         | -           | 2.4           | 3.1                          | 2.3   | 3.7                         | 2.4   | 2.4    |
| Pr <sub>0.2</sub> Ce <sub>0.8</sub> W          | 3.1                          | 2.3     | 3.7                         | -           | 2.4           | 3.1                          | 2.3   | 3.7                         | 2.4   | 2.4    |
| Pr <sub>0.3</sub> Ce <sub>0.7</sub> W          | 3.1                          | 2.3     | 3.7                         | -           | 2.4           | 3.1                          | 2.3   | 3.7                         | 2.4   | 2.4    |
| Inter-component peak area ratios               |                              |         |                             |             |               |                              |       |                             |       |        |
|                                                | $Iv_0/Iu_0$                  | $Iv/Iu$ | $Iv'/Iu'$                   | $Iv''/Iu''$ | $Iv'''/Iu'''$ |                              |       |                             |       |        |
| CeO <sub>2</sub>                               | 1.51                         | 1.56    | 1.51                        | 1.45        | 1.45          |                              |       |                             |       |        |
| Ce <sub>4</sub> W <sub>9</sub> O <sub>33</sub> | 1.47                         | 1.47    | 1.46                        | -           | 1.46          |                              |       |                             |       |        |
| Pr <sub>0.1</sub> Ce <sub>0.9</sub> W          | 1.53                         | 1.47    | 1.50                        | -           | 1.48          |                              |       |                             |       |        |
| Pr <sub>0.2</sub> Ce <sub>0.8</sub> W          | 1.53                         | 1.47    | 1.53                        | -           | 1.53          |                              |       |                             |       |        |
| Pr <sub>0.3</sub> Ce <sub>0.7</sub> W          | 1.48                         | 1.47    | 1.51                        | -           | 1.50          |                              |       |                             |       |        |
| Spin-orbit splitting (eV)                      |                              |         |                             |             |               |                              |       |                             |       |        |
|                                                | $v_0/u_0$                    | $v/u$   | $v'/u'$                     | $v''/u''$   | $v'''/u'''$   |                              |       |                             |       |        |
| CeO <sub>2</sub>                               | 18.5                         | 18.5    | 18.3                        | 18.6        | 18.4          |                              |       |                             |       |        |
| Ce <sub>4</sub> W <sub>9</sub> O <sub>33</sub> | 18.5                         | 18.5    | 18.5                        | -           | 18.5          |                              |       |                             |       |        |
| Pr <sub>0.1</sub> Ce <sub>0.9</sub> W          | 18.5                         | 18.5    | 18.5                        | -           | 18.5          |                              |       |                             |       |        |
| Pr <sub>0.2</sub> Ce <sub>0.8</sub> W          | 18.5                         | 18.6    | 18.5                        | -           | 18.5          |                              |       |                             |       |        |
| Pr <sub>0.3</sub> Ce <sub>0.7</sub> W          | 18.5                         | 18.5    | 18.3                        | 18.6        | 18.4          |                              |       |                             |       |        |

**Table S3** XPS Pr 3d spectra peak table

| Peaks                                          | a     | a´      | a´´ (Pr <sup>4+</sup> ) | b       | b´        | t     | b´´ (Pr <sup>4+</sup> ) |
|------------------------------------------------|-------|---------|-------------------------|---------|-----------|-------|-------------------------|
| Pr 3d peak BE values (eV)                      |       |         |                         |         |           |       |                         |
| Pr <sub>6</sub> O <sub>11</sub>                | 927.9 | 932.6   | 945.3                   | 948.3   | 953.0     | 957.2 | 965.6                   |
| Pr <sub>0.1</sub> Ce <sub>0.9</sub> W          | 929.5 | 933.5   | -                       | 949.8   | 953.8     | 957.7 | -                       |
| Pr <sub>0.2</sub> Ce <sub>0.8</sub> W          | 929.5 | 933.5   | -                       | 949.8   | 953.8     | 957.7 | -                       |
| Pr <sub>0.3</sub> Ce <sub>0.7</sub> W          | 929.4 | 933.4   | -                       | 949.7   | 953.7     | 957.6 | -                       |
| Pr <sub>4</sub> W <sub>9</sub> O <sub>33</sub> | 930.0 | 934.0   | -                       | 950.4   | 954.4     | 958.3 | -                       |
| Area percentages I (%)                         |       |         |                         |         |           |       |                         |
| Pr <sub>6</sub> O <sub>11</sub>                | 17.6  | 41.7    | 3.1                     | 10.2    | 23.8      | 4.7   | 2.0                     |
| Pr <sub>0.1</sub> Ce <sub>0.9</sub> W          | 20.1  | 39.6    | -                       | 11.6    | 22.9      | 5.8   | -                       |
| Pr <sub>0.2</sub> Ce <sub>0.8</sub> W          | 18.8  | 40.3    | -                       | 11.4    | 23.4      | 6.1   | -                       |
| Pr <sub>0.3</sub> Ce <sub>0.7</sub> W          | 19.2  | 41.0    | -                       | 11.1    | 23.6      | 5.1   | -                       |
| Pr <sub>4</sub> W <sub>9</sub> O <sub>33</sub> | 19.3  | 41.5    | -                       | 10.9    | 23.4      | 4.8   | -                       |
| FWHM (eV)                                      |       |         |                         |         |           |       |                         |
| Pr <sub>6</sub> O <sub>11</sub>                | 3.5   | 4.6     | 3.1                     | 3.6     | 4.7       | 3.9   | 3.1                     |
| Pr <sub>0.1</sub> Ce <sub>0.9</sub> W          | 4.0   | 4.0     | -                       | 4.0     | 4.0       | 3.3   | -                       |
| Pr <sub>0.2</sub> Ce <sub>0.8</sub> W          | 4.0   | 4.0     | -                       | 4.0     | 4.0       | 3.3   | -                       |
| Pr <sub>0.3</sub> Ce <sub>0.7</sub> W          | 4.0   | 4.0     | -                       | 4.0     | 4.0       | 3.3   | -                       |
| Pr <sub>4</sub> W <sub>9</sub> O <sub>33</sub> | 4.0   | 4.0     | -                       | 4.0     | 4.0       | 3.3   | -                       |
| Inter-component peak area ratios               |       |         |                         |         |           |       |                         |
|                                                | Ia/Ib | Ia´/Ib´ | (Ia+Ia´)/(Ib+Ib´+It)    |         | Ia´´/Ib´´ |       |                         |
| Pr <sub>6</sub> O <sub>11</sub>                | 1.73  | 1.75    | 1.53                    |         | 1.55      |       |                         |
| Pr <sub>0.1</sub> Ce <sub>0.9</sub> W          | 1.73  | 1.73    | 1.48                    |         | -         |       |                         |
| Pr <sub>0.2</sub> Ce <sub>0.8</sub> W          | 1.65  | 1.72    | 1.44                    |         | -         |       |                         |
| Pr <sub>0.3</sub> Ce <sub>0.7</sub> W          | 1.73  | 1.73    | 1.51                    |         | -         |       |                         |
| Pr <sub>4</sub> W <sub>9</sub> O <sub>33</sub> | 1.77  | 1.77    | 1.55                    |         | -         |       |                         |
| Spin-orbit splitting (eV)                      |       |         |                         |         |           |       |                         |
|                                                | a/b   | a´/b´   |                         | a´´/b´´ |           |       |                         |
| Pr <sub>6</sub> O <sub>11</sub>                | 20.4  | 20.4    |                         | 20.3    |           |       |                         |
| Pr <sub>0.1</sub> Ce <sub>0.9</sub> W          | 20.3  | 20.3    |                         | -       |           |       |                         |
| Pr <sub>0.2</sub> Ce <sub>0.8</sub> W          | 20.3  | 20.3    |                         | -       |           |       |                         |
| Pr <sub>0.3</sub> Ce <sub>0.7</sub> W          | 20.3  | 20.3    |                         | -       |           |       |                         |
| Pr <sub>4</sub> W <sub>9</sub> O <sub>33</sub> | 20.4  | 20.4    |                         | -       |           |       |                         |

Inter-component peak area ratios of a''/b'' doublets is 1.55, which is characteristics of typical 3d orbital doublets. However, area ratios of a/b and a'/b' doublets were 1.73 and 1.75, showing slightly higher values. And these values were similar to the 1.72, the area ratio of a/b and a'/b' doublets presented by Borchert in the XPS Pr 3d spectra.<sup>S12</sup> Interestingly, the value of  $(I_a + I_{a'}) / (I_b + I_{b'} + I_t)$  including the structural factor (t) and two doublets (a/b, a'/b') was 1.53, which was close to the 2:3 ratio of a typical 3d orbital.

## REFERENCES

- S1 M. Yoshimura, F. Sibieude, A. Rouanet and M. Foex, *J. Solid State Chem.*, 1976, **16**, 219–232.
- S2 J. A. Horsley, I. E. Wachs, J. M. Brown, G. H. Via and F. D. Hardcastle, *J. Phys. Chem.*, 1987, **91**, 4014–4020.
- S3 M. F. Daniel, B. Desbat and J. C. Lassegues, *J. Solid State Chem.*, 1987, **67**, 235–247.
- S4 W. H. Weber, K. C. Hass and J. R. McBride, *Phys. Rev. B*, 1993, **48**, 178–185.
- S5 L. Macalik, J. Hanuza and A. A. Kaminskii, *J. Mol. Struct.*, 2000, **555**, 289–297.
- S6 L. J. Burcham and I. E. Wachs, *Spectroc. Acta Pt. A-Molec. Biomolec. Spectr.*, 1998, **54**, 1355–1368.
- S7 M. Yoshimura, T. Sata, T. Nakamura, *Nippon Kagaku Kaishi*, 1973, **5**, 2287–2294.
- S8 J.-W. Yoon, J.-S. Kim, T.-H. Kim, Y. J. Hong, Y. C. Kang and J.-H. Lee, *Small*, 2016, **12**, 4229–4240.
- S9 C.-H. Kwak, T.-H. Kim, S.-Y. Jeong, J.-W. Yoon, J.-S. Kim and J.-H. Lee, *ACS Appl. Mater. Interfaces*, 2018, **10**, 18886–18894.
- S10 J.-S. Kim, C. W. Na, C.-H. Kwak, H.-Y. Li, J. W. Yoon, J.-H. Kim, S.-Y. Jeong and J.-H. Lee, *ACS Appl. Mater. Interfaces*, 2019, **11**, 25322–25329.
- S11 S.-Y. Jeong, Y. M. Moon, J. K. Kim, S.-W. Park, Y. K. Jo, Y. C. Kang and J.-H. Lee, *Adv. Funct. Mater.*, 2020, 2007895.
- S12 H. Borchert, Y.V. Frolova, V. V. Kaichev, I. P. Prosvirin, G. M. Alikina, A. I. Lukashevich, V. I. Zaikovskii, E. M. Moroz, S. N. Trukhan, V. P. Ivanov, E. A. Paukshtis, V. I. Bukhtiyarov and V. A. Sadykov, *J. Phys. Chem. B*, 2005, **109**, 5728–5738.
